# Supplementary material for: New Y2BaAl4SiO12:Ce3+yellow microcrystal-glass powder phosphor with high thermal emission stability
Source: Royal Society of Chemistry journal article supplement (doi:10.1039/c6tc03422e), 2016-01-01
Supplement: c6tc03422e1.pdf [file c6tc03422e1.pdf]

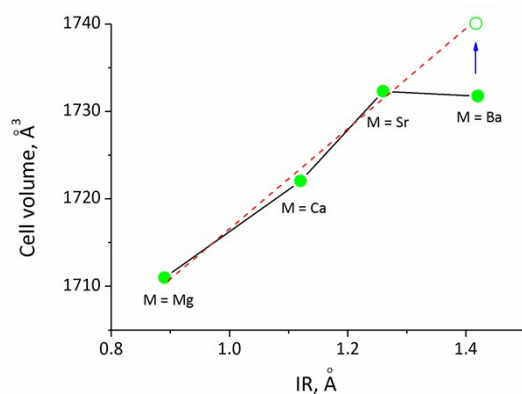

Fig. S1 Cell volume of  $Y_{1.96}Ce_{0.04}MAI_4SiO_{12}$  per ion radius (IR) of M cation. The trend doesn't show wholly linear due to an unexpected small volume of M = Ba compound. Red dashed line illustrates a linear trend.

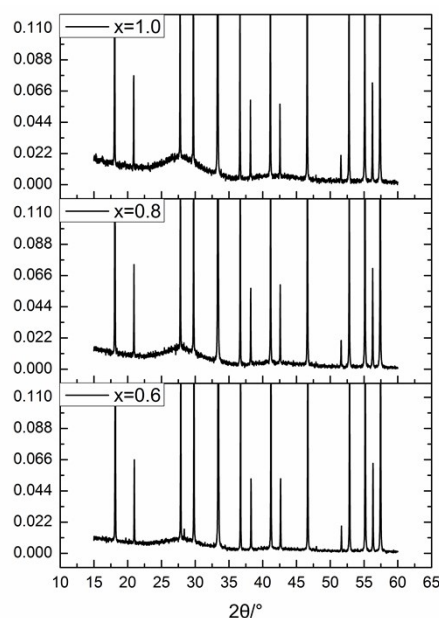

Fig. S2 Normalized XRD patterns of  $Y_{2.96-x}Ba_xCe_{0.04}Al_{5-x}Si_xO_{12}$  samples.

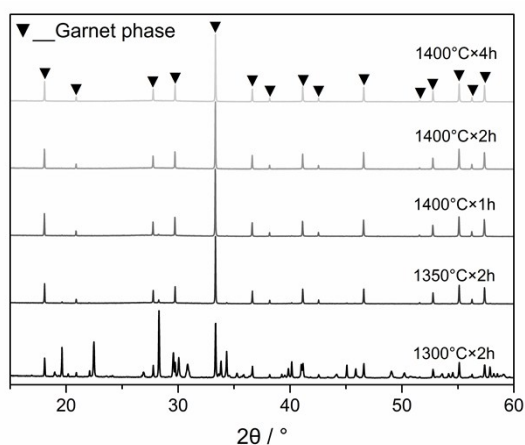

Fig. S3 XRD patterns of the samples with nominal composition of  $Y_{1.96}BaAl_4SiO_{12}:0.04Ce^{3+}$  sintered at 1300-1400 °C with holding time of 1-4 h.
